# Supplementary material for: Broad spectrum antibacterial photodynamic and photothermal therapy achieved with indocyanine green loaded SPIONs under near infrared irradiation
Source: Royal Society of Chemistry journal article supplement (doi:10.1039/d0bm00821d), 2020-01-01
Supplement: d0bm00821d1.pdf [file d0bm00821d1.pdf]

## Supporting information

### **Broad spectrum antibacterial photodynamic and photothermal therapy achieved with indocyanine green loaded SPIONs under near infrared irradiation**

**Kubra Bilici, ‡<sup>a</sup> Nazlı Atac, ‡<sup>b</sup> Abdullah Muti, ‡<sup>c</sup> Işinsu Baylam,<sup>d</sup> Ozlem Dogan,<sup>b</sup> Alphan Sennaroglu,<sup>c,d</sup> Fusun Can,<sup>\*b</sup> and Havva Yagci Acar<sup>\*a,d</sup>**

<sup>a</sup>Koç University, Department of Chemistry, Rumelifeneri Yolu, Sariyer, Istanbul 34450, Turkey

<sup>b</sup>Koç University School of Medicine, Department of Infectious Diseases and Clinical Microbiology, Topkapı, Istanbul, Turkey

<sup>c</sup>Koç University, Departments of Physics and Electrical-Electronics Engineering, Rumelifeneri Yolu, Sariyer 34450, Istanbul, Turkey

<sup>d</sup>KUYTAM, Koç University Surface Science and Technology Center, 34450 Istanbul, Turkey

**‡ KB, NA, AM are equally contributing first authors.**

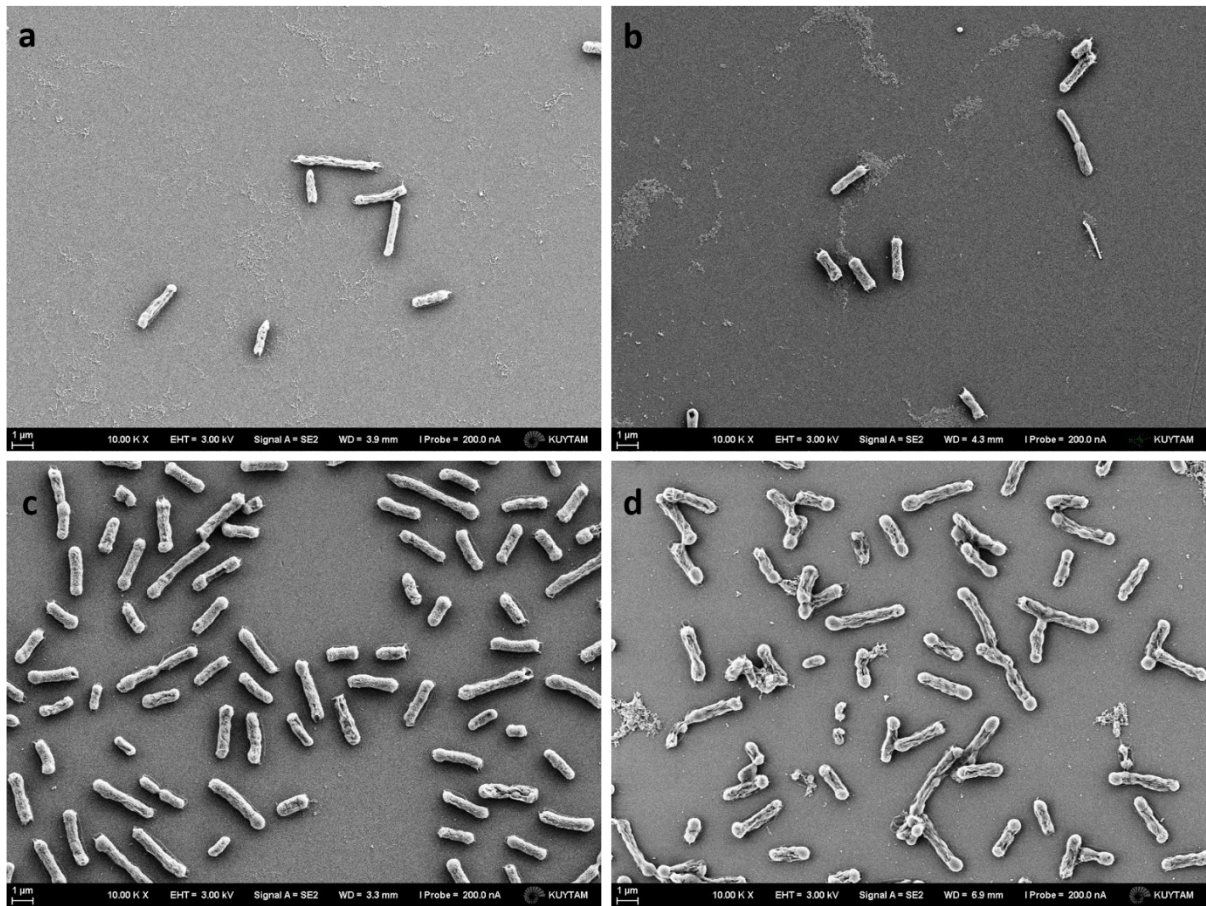

**Fig. S1** SEM images of bacterial biofilms **a)** *E.coli* biofilm with ICG **b)** *E.coli* biofilm with ICG-APTMS@SPION **c)** *K.pneumoniae* biofilm with ICG **d)** *K.pneumoniae* biofilm with ICG-APTMS@SPION
